# Supplementary material
Source: MDPI journal article supplement (https://www.mdpi.com/2073-4441/10/3/259)
Supplement: s1 [file s1]

## Sheet: Overview
Table S1. Summary of 32 reviewed articles that used models as a tool to assess and analyze the ecological impact of hydropower dams.
Paper	Model's goals	Type of model	Model approach/description	Model's name	Input variables	Output variable	Model calibration/training	Model validation	Model'strength	Model's limitations/weaknesses	Model's opportunities	Model's threat
Bartholow et al., 2005	To predict how removing the series of dams below Upper Klamath Lake (USA) might affect water temperatures,and ultimately fish (i.e. Salmon) survival, in the spawning and rearing portions of the mainstem Klamath.	Integrated		Not mentioned	*Integration of MODSIM and HEC-5Q	Water temperature (the authors used the maximum recommended temperature from the ranges for three life stages of salmon to predict the fish survival, spawning and rearing)			1. Model was calibrated and validated by a large dataset over long periods of time and large spatial scale	1. Predicts salmon's survival, spawning and rearing only based on water temperature. Other factors could have affected the survival of the Salmon. 2. Does not quantify the fish production. 3. Does not answer how thermal phase shift might affect the salmon's behavior and would not address impacts to species having different life-history traits and thermal requirements. 4. Model did not address oth…	1. The application of a decision support system and careful examination of the output can provide valuable insights to the decision-making process. 2. Incorporation of other variables in the model that may have an influence on the survival of Salmon.
		* Water quantity (hydrodynamic model)	One-dimensional equations or estimated stream-depletion factors	MODSIM (Labadie 1988; Dai and Labadie 2001)	Historical records and/or simulated flows		Yes	Yes
		* Water quality model	Differential equations	HEC-5Q (USACE 1986)	Daily average discharge, temperature for all inflowing water and daily average meteorological data (including air and dew point temperatures, wind speed, and cloud cover)		Yes	Yes
Boavida et al., 2015	Investigate the effects of hydropeaking in the habitat of the Iberian barbel (Luciobarbus bocagei) a native cyprinid fish species of the Iberian Peninsula.	Integrated model							1. The coupling of a 2-dimensional hydraulic model and habitat suitability model offers 2-dimensional simulation of habitat suitability. 2. Able to evaluate the effect of hydropeaking.	1. Model validation was not perfomed.	1. To model a longer river stretch and larger spatial coverage. 2. Model the long term effect of hydropeaking. 3. To model the relationship between base and peak flows in relation to ecological integrity, system productivity and biodiversity.
		*Hydrodynamic model	Differential equations	River2D (Steffler, 2000)	Water surface elevations and cross-sectional velocity profiles	Velocity and depth	Yes	No
		*Habitat suitability model	Fuzzy rules and fuzzy set	Not mentioned	Depth, velocity and depth	Habitat suitability index (expressed in very low; low; medium; high; very high)	Via collected data and expert knowledge	No
		*Habitat simulation	Center of gravity method	CASiMiR Fish 2D model (Computer Aided Simulation Model for Instream Flow Regulation) (Jorde, 1997; Schneider, 2001; Schneider et al., 2010)	Output from the hydrodynamic and habitat suitability models	Habitat simulation
Bondi et al., 2013	To quantify key hydraulic habitat conditions for Foothill Yellowlegged frogs (Rana boylii) in rivers of the Sierra Nevada (California, USA) to evaluate methods of developing Habitat Suitability Criteria (HSC)	*Habitat suitability model	Interval-based univariate suitability indices	Not mentioned	Total depth, mid-column velocity, and dominant substrate (attachment substrate for egg masses and dominant microhabitat substrate for tadpoles)	Habitat suitability index (HSI)	Based on data	Yes	1. The study recommended percentile-based univariate HSI. Strength of this method is that set biological limits of suitability rather than artifact of mathematical manipulation. 2. The models can therefore be used to predict the quantity and distribution of suitable hydraulic conditions for a species and to assess what flow may potentially limit or enhance reproductive output. 3.The model is simp…	1. Do not predict future densities of populations under varying flow conditions, but only the availability of habitat suitable for occupation. 2. The model do not take into account other non-hydraulic factors such as temperature, riparian conditions, food availablitity and channel morphology.	1. Model will provide a tool for water managers to quantify changes in viable habitats required by critical life stages under varying flows (e.g. during the operation of dam).
		*Habitat suitability model	Percentile-based univariate suitability indices	Not mentioned		Habitat suitability index	Based on data	Yes
		*Habitat suitability model	Multivariate habitat suitability index using a logistic regression	Not mentioned		Habitat suitability index	Based on data	Yes
		Hydrodynamic model (applied only in one of the eight study sites)	Differential equations	River2D (Steffler, 2000)	Already calibrated	Depths, mid-column velocities, and dominant substrate types	The model was already calibrated	No
Cerny et al., 2003	1. To assess the change in species richness and habitat use 2. To predict 1996 fish occurrences, abundance, relative density from the 1992 data set.	Habitat suitability model	Multiple linear regression model	Not mentioned	Habitat data	Abundance of fish	Yes	Yes	1. Model validation was performed. 2. The model were trained based on collected data at different years (1992 and 1996)	1. The models lack predictive ability. 2. In one of the models (simple linear regression), the output variable (i.e. relative density) was transformed.	1. Model can be fitted with additional data that will be or were collected to increase its predictive ability.
		Habitat suitability model	Generalized additive logistic regression model	Not mentioned	Distance, depth, substratum, macrophyte, ligneous, velocity, temperature with *variables in bold were retained in the model	Presence/absence of fish	Yes	Yes
		Habitat suitability model	Simple linear model	Not mentioned	Each channel type	Fish richness and relative density	Yes	Yes
Cioffi and Gallerano, 2012	To assess dam releases from hydropower reservoirs in order to optimize power production and fish habitat protection	Integrated model		Multi-objective optimization model					1. Model allows the simulation of fish habitat during dam operation (i.e. With varying flow discharge) and enables the optimization of power production and fish habitat protection.	1. Considers limited environmental variables influencing the suitability of fish. 2. Model was not validated.	1. Proposed approach can effectively be extended to other situations beyond the ones in the study, provided that there is a detailed knowledge of hydraulic, morphological and biotic community characteristics of the specific river environment, as well as of the relationship, for the selected target fish species, between hydraulic variables and habitat suitability 2. Model that not only provide a h…	1. The acquisition of the data required in the model is a challenge
		*Hydrodynamic model	Two-dimensional shallow water motion equations	2D Hydraulic Model	Flow rate Q, depth averaged velocity, depth in the two-dimensional domain representing the river stretch	Depth averaged velocity and the depth	Yes	No
		*Habitat suitability model	Polynomial expressions	Habitat suitability curves	Depth, velocity	Habitat suitability index	Already developed	No
		* Multi-objective optimization method	ε-constraint method and NSGA II (Non-dominant-sorting genetic algorithm)	Not mentioned	Output from Hydrodynamic and habitat suitability models	Optimization of power production and fish habitat protection	Yes	No
Enders et al., 2009	To identify flow requirements for different life stages of anadromous Atlantic salmon (Salmo salar L.). and explore the potential effects of different flow regime scenarios on a wild Atlantic salmon population in Harry’s River, Western Newfoundland, Canada	Habitat suitability model	Conceptual model, based on published and anecdotal knowledge	Not mentioned	Flow discharges	Suitability of each life history stages	Yes	No	1. Complicated mathematical computation is not needed. 2. Model's simplicity.	1. Little is known about the salmon's discharge requirements during critical life stages. 2. There is no actual quantification of the magnitude of flow needed. 3. The available data that was used to build the conceptual model on Atlantic salmon habitat preferences have weakneses as most published studies have been conducted in wadable streams, and consequently habitat preferences may be biased to…	1. The use of flood frequency analysis to assist in design of a temporally variable flow regime, on an interannual basis. 2. The evaluation of "natural flow paradigm" can be undertaken in an adaptive management context such that the regime can be further optimized and any flow release agreement, where possible, should contain provisions for modification.These types of evaluation may also be condu…
Freeman et al., 2001	To quantify temporal availability of habitat types to the fish fauna.	Hydrodynamic model	Combination of one-dimensional hydraulic simulation techniques, Washington Method (the concept of mapping depth and velocity conditions over gravel bars) and the univariate curve concept	Physical habitat simulation (PHABSIM)	Depth, average water column velocity, and visually estimated dominant substratum type and the presence of cover (e.g., woody debris, boulders)	Simulation of physical habitat (water velocity and depths) *Hydraulic simulations were used to compute the area coverage of three of the five key fish habitats	Yes	No	1. Model was calibrated using a relatively huge dataset. 2. Model is readily available.	1. Model validation was not perfomed. 2. Only uses flow and habitat patterns to determine fish populations and species persistence but other variables can play an important role.	1. Model can be applied in management strategies of flow-altered rivers, specifically during a dam operation.
Fullerton et al., 2009	To estimate habitat conditions above the dams and fish population responses	Integrated model							1. Thorough consideration of various processes that may involve the main output variables. 2. Both the expected changes in habitat conditions and in resulting fish responses were assessed. 3. Because multiple models were used to assess various outcomes, there are a variety of metrics to help assess a particular course of action. 4. Multiple models enabled to address the four viable salmonid popul…	2. Model is too complicated. 2. As some model outputs are input to other models, these may increase the model errors. 3. As the modelling approach is complex, there are many layers of uncertainty coupled with it. 4. Needs a lot of different data to calibrate or train the model. 5. Factors that may affect model predictions are: accuracy of model input data and structure and parameterization of mod…	1. Application of model prediction at a finer resolution for reaches under consideration for restoration projects.
		*Riparian function model	Three-part decision-tree model that predicts qualitative riparian conditions within 60 m of each bank. Models predicting pool-forming conifers (bankfull width, channel gradient, riparian vegetation characteristics and tree size) and large woody debris recruitment (bankfull width, riparian vegetation characteristics and tree size) are adapted from Lunetta et al. (1997) for local conditions. Shade …	Riparian Functions	Bankful width, elevation, tree cover, % coniferous, conifer size, stream gradient	LWD score (L), shade score (S), Pool-forming conifers score (P), LSP composite, seral stage	Yes	Not mentioned
		*Sediment input	Three-part model predicting the amount of surface erosion from adjacent hillslopes, sediment input contributed by roads in adjacent drainage areas, and sediment coming directly from mass wasting. Surface erosion and road sediment are adapted from the Water Erosion Prediction Project (WEPP; Flanagan and Livingston 1995), and mass wasting predictions are derived from road density, land cover and sl…	Sediment Input	Output from riparian function model (LSP composite), soil class, hill slope, lateral drainage area, land use/cover, road characteristics, slope stability	Surface erosion, road sediment,mass wasting (kg/yr)	Yes	Not mentioned
		*Hydrologic runoff model	Model that predicts the amount of water reaching streams from overland flow (adapted from WEPP; Flanagan and Livingston 1995), and uses discharge at US Geological Survey index gages in the Lewis River, land use, road density, soil type, and hillslope to predict stream discharge expected during a 2.3-year flood.	Surface Runoff	Output from riparian function model (LSP composite), Soil class, hill slope, lateral drainage area, land use/cover, road density, discharge	Surface runoff, 2.3 yr flood discharge	Yes	Not mentioned
		* Routing model	Routing model (Miller 2003) that uses outputs from the above three models to predict sediment transport and deposition rates. Fine sediment deposition and bed scour are predicted using transport rates and local stream habitat survey data.	Sediment Transport	Output from sediment input model (surface erosion, road sediment, mass wasting (kg/yr)), Output from hydrologic runoff (surface runoff, 2.3 yr flood discharge), sediment grain size, stream network, field surveys	Bed sour index (fines deposited (%))	Yes	Not mentioned
		*Spawner capacity model	Broad-scale model adapted from Lunetta et al. (1997) that uses remotely sensed riparian seral stage, bankfull width, and channel gradient to predict capacity for spawners.	Spawning Habitat Capacity	Output from riparian function model, stream gradient	Chinook (Salmon) capacity	Yes	Not mentioned
		*Habitat suitability model	Model that combines species-specific spawning requirements (channel gradient, bankfull width, hydrologic regime) with anthropogenic effects (fine sediment in spawning gravels, altered riparian conditions) to predict spawning habitat suitability. Based on Burnett et al. (2007).	Spawning Habitat Suitability	Ouput from riparian function model routing model (Bed scour index, fines deposited, stream gradient, hydrological regime, bankful width	Suitability score for spring Chinook, fall Chinook, summer Steelhead, winter Steelhead, Chum	Yes	Not mentioned
		*Egg to fry survival model	Empirical relationships and confidence intervals derived from meta-analyses of relationships between percent fine sediment in spawning gravels and survival of eggs to fry from published studies (Jensen et al. in review; Steel et al. 2007).	Egg-to-fry Survival	Output from routing model, literature values of survival	Survival for Chinook salmon, Coho salmon, Steelhead	Yes	Not mentioned
Garcia et al., 2011	To predict changes in habitat availability and suitability due to dam operation and water extractions during the summer season	Integrated model							1. Model is relatively simple. 2. Provides the habitat suitability maps of fish. This allows visualization of areas within the river that provide certain physical conditions for fish under a steady flow situation. 3. Allows to simulate habitat changes and eventually habitat suitabity of fish during dam operations.	1. Only three variables were used as input variable. Other variables might influence the habitat suitability of fish. 2. The model was not validated.	1. Incorporation of other variables that can influence the suitabilty of fish.
		* Hydrodynamic model	Differential equations, Psuedo 2-dimensional river hydraulics	HEC-RAS (performs one-dimensional hydraulic calculations)	Topography and roughness (XYZ coordinates plus substratum type), flow discharge and water surface elevation	Hydraulics	Yes	Not mentioned
		*Habitat suitability model	Fuzzy rules and fuzzy set	Not mentioned	Flow velocity, water depth and dominant substrate	Habitat suitability index	Based on expert knowledge and data	No
		* Habitat simulation		CASiMiR	Output from the hydrodynamic and habitat suitability models	Simulations	Yes	Not mentioned
Gore and Hamilton, 2006	To evaluate stream enhancement activities on a low-order stream, with the placement of a series of three-log weirs on Brushy Branch, a second-order stream in Tennessee	Hydrodynamic model	PHABSIM is the combination of one-dimensional hydraulic simulation techniques, Washington Method (the concept of mapping depth and velocity conditions over gravel bars) and the univariate curve concept	Instream Flow Incremental Methodology (IFIM)/Physical habitat simulation (PHABSIM)	Channel morphology, characteristics of flow.	Changes in velocity, depth and channel resistance	Yes	Not mentioned	1.Model (i.e. PHABSIM) is useful in evaluating habitat structures that enhance preferred hydraulic conditions for target biota 2. Model simulation has demonstrated the theoretical benefit of a regulation structure as a device to remediate effect on hydraulic habitat downstream of a peaking hydropower facility. 3. PHABSIM can simulate or predict a monthly or daily hydrograph and the predictions of…	1. The mobility of most fish species is easy to estimate increases or losses in available habitat as peaking waves pass through a stream reach but difficult to demonstrate the response of the fish to that temporary gain or loss of habitat. 2. IFIM/PHABSIM model do not represent the indirect effects of flow and flow variability that may be most important in these habitats (Grand et al., 2006).	1. Linking the PHABSIM with water quality, dynamic flow can answer many restoration questions even when regulated flow conditions are not present. 2. The relationship between physical habitat and the density of non-mobile organisms, such as benthic macroinvertebrates is predictable.
		Habitat suitability models	Exponential polynomial regressions	Habitat suitability curves	Velocity, depth and substrate	Diversity (fish and macroinvertebrates)	Yes	Not mentioned
Grand et al., 2006	To predict the effects of mainstem flow variation on backwater temperature, geometry and invertebrate availability on the Colorado pikeminnow (Ptychocheilus Lucius)	Integrated model							1. Makes several testable predictions about the effects of flow fluctuations on backwater geometry, temperature and invertebrate availability. 2. The model is relatively simple.	1. The model have made assumptions and simplifications that may affect the predictions generated. One of the assumption is that model does not allow the possibility that backwaters may become flow-through habitats at higher flow. That is, backwaters is assumed to be connected to the mainstem at only a single point (as is the case for the backwaters considered here), and that water exchange and fl…	1. Addition of other processess that deals with the assumptions to make the model more realistic.	1. By making the model more realistic, the addition of relevant processes would undoubtedly increase its overall complexity and potentially reduce our ability to understand any observed effects on Pikeminnow growth and survival
		*Hydrodynamic model	Agent-based	Physical habitat model	Cell coordinates (x, y and z or bed elevation; measured in m and assumed to be fixed over the time period modelled) and hourly mainstem flow	Backwater topography	Yes	Not mentioned
		*Water quality model	Heat balance approach	Backwater temperature model	Calculated mainstem inflow and hourly input data for mainstem water temperature, air temperature, humidity, wind speed and cloud cover	Water temperature	Calibration and sensitivity analysis	Calibrating two backwater analysis and were in agreement.
		*Food web model	Combination of empirical approach and experimental data	Food availability model	Growth rate of an individual chironomid larva , average daily temperature in the backwater, mean invertebrate size, average density of invertebrates	Daily food production (based on chironomid larvae)	Calibration and sensitivity analysis	Yes
Grill et al., 2014	To calculate the individual and cumulative impact of 81 proposed dams	River routing model	Graph-theoretical framework (A model based on the HydroSHEDS database at 500 m (15'') spatial resolution within the Geographic Information System (ESRI ArcGIS10.1))	HydroROUT river routing model	Information about dams, total river length, total length of the entire river network, total river volume, total number of distinct river classes,	Connectivity indices	Yes	No	1. The resulting index takes into account both river class diversity and migratory species ranges, and is thus more capable of identifying special or unique constellations.	1. In the connectivity model, it was assumed that a river network without any dams is fully connected. However, natural barriers and discontinuities could be observed in rivers without any dams. 2. Only large dams were considered, while many smaller dams are missing. Small dams can have a significant cumulative effect on flow regulation. 3. The hydrological model only provides long term average f…	1. There is a possibility that migration ranges (one of the model output) of several species can be created through relatively simple species distribution modeling techniques and be included in dam impact assessments. 2. Inclusion of more data on locations with natural discontinuities to include a more differentiated view of natural discontinuities. 3. Inclusion of smaller dams in the model.
Hatten et al., 2009	To quantify the effects of variable flows on the amount and persistence of fall Chinook salmon spawning habitat in the Hanford Reach, Washington State	Integrated model		Hanford Reach fall Chinook spatial model				Yes	1. The model included novel variables that captured the variation and persistence of the hydraulic conditions that comprise suitable spawning habitat. 2. Testing other variables that could have the greatest association with with fall Chinook spawning sites. 3. The model includes parameters that capture both the variation and persistence (stability) of hydraulic conditions	1. The total spawning habitat area estimates should be considered conservative because the habitat in deepwater areas are potentially underestimated.	1. Possible extrapolation of the model in other areas of the Columbia River. 2. The model can be used as a planning and evaluation tool for managers when the goal is to balance fall Chinook salmon habitat needs, hydropower production, and efficient use of water storage
		*Hydrodynamic model	Differential equations	MASS1	Digital elevation model (DEM)	Boundary conditions for a set of simulation flows	Yes
		*Hydrodynamic model	Differential equations	River2D	MASS1 boundary conditions, the DEM, and the computational mesh	Velocity and depth at a series of flow levels	Yes
		*Habitat suitability model	Cell based and logistic regression	Spatial habitat models	Velocity, substrate, depth, lateral slope, distance from island, location within reach, river section)	Presence/absence of spawning	Yes
Hatten and Batt, 2010	To simulate and compare the hydraulic characteristics in a 74-km reach of the Columbia River (the Bonneville Reach) before and after construction of Bonneville Dam	Hydrodynamic model	Differential equations	River2D	Digital elevation model (DEM), flows, downstream water surface elevation (WSE), channel bottom roughness	Velocity and depth	Yes	Yes	1. The model is relatively simple. 2. Relatively accurate. 3. The resolution and accuracy can be sufficient to characterize the hydraulic regimes at multiple flows.	1. The model is unable to accurately quantify all changes that resulted from river impoundment. 2. Exclusion of some off-channel areas in the analysis due to the difficulty of collecting bathymetry in those locations.	1. Potential application of the model are: (1) the assessment of the impact of altering the hydrograph on the flora and fauna; (2) the construction of habitat suitability models for fish and can assist in the development of predictive models for invasive species; (3) its usefuness in the estimation of benthic invertebrate abundance; (4) the prediction of fish traits (5) the identification of salm…
Jacoub and Westrich, 2006	To estimate and predict the potential impact of mobilized contaminants as an important contribution to sediment management. To analyse the dynamics of erosion and sedimentation processes in the headwater of a cross dam at the Upper Rhine River	Transport model	2D numerical model	Not mentioned	Inflow discharge, water level, suspended sediment, particulate hexachlorobenzene (HCB) content in the water body	Dynamics of erosion, sedimentation processes, and concentration of particulate HCB in the river bed.	Yes	No	1. The model is able to provide a realistic estimation of the spatial and temporal distribution of the fractional suspended sediment concentraions, particulate HCB, sedimentation and erosion rates before, during, and after the flood event 1999.	1. The model was developed and applied in spite of the poor database (limited number of data).	1. Full calibration and validation of the data based on field and laboratory measurements.
Kocovsky et al., 2009	To provide a biologically based prioritization for removal of dams; to assist with decisions to remove dams; to increase potential for successful re-establishment of diadromous species in the Susquehanna River basin	Habitat suitability models	U.S. Fish and Wildlife Service method (HSI = Study area habitat conditions/Optimal habitat conditions) and Pennsylvania State University method (using the habitat suitability curves)	Not mentioned	Substrate particle size, current velocity, depth, temperature, pH, dissolved oxygen, conductivity, turbidity	Habitat suitability index	Yes	Not mentioned	1. Relatively simple.	1. The use of average HSI values of the nearest upstream and downstream transect added a source of error to the HSI data. 2. Uncertainty in the assessment of habitat suitability (i.e. the study is using inferred suitability in the absence of the species of interest).	1. Facilitates a biologically-based method for assessing the potential for successful re-establishment of diadromous alosines and American eel in Pennsylvania tributaries to the Susquehanna River using suitability of instream habitat and relationships between HSIs and landscape-scale features.
Krause et al., 2005	To evaluate the potential for thermal habitat improvement, temperature changes resulting from alternative flows	Integrated model		TVA River Modeling System					1. A dynamic model that can deal with the rapidly changing flow conditions. 2. Able to model thermal conditions that can be modified to benefit brown trout compared to existing conditions.	1. Only considers water temperature however, other variables could affect the biota.	1. Water temperature is often an overriding biological limitation, therefore, water temperature is a likely parameter for modelling by water management agencies that do not always have the resources to conduct comprehensive biological assessments.
		*Hydrodynamic model	Differential equations	ADYN	Hourly meteorological and solar radiation parameters were obtained from the nearest observation stations, discharge data, lateral inflows, stream width, riparian vegetation offset from stream-bank, and vegetation height, elevation, latitude, longitude, river kilometer locations and azimuth	Water temperature	Yes	Yes
		*Water quality model	Differential equations	RQUAL	Output from ADYN model, water temperature	Water temperatures	Yes	Yes
Kunz et al., 2009	Explored the effects of tropical reservoirs on biogeochemical cycles. Specifically, to quantify the removal of particles, C, N, and P, and estimate alterations to C and nutrient cycling through internal processes within the reservoir and to assess the sensitivity of water quality to a future change of operating rules due to new turbine installations.	Water quality model	Mass balance equations	RES1 (adapted BELAMO)	Temperature profiles, daily discharge data, biogeochemical parameters and processes, sediment parameterization, N fixation process,	Temperature (T), nitrate, ammonium, dissolved oxygen, soluble reactive P, total phytoplankton, total zooplankton, and dead organic matter (OM), and includes the biogeochemical processes of growth, respiration, and death of phytoplankton and zooplankton, P removal by adsorption to sinking particles, and water column and sediment mineralization	Yes	Not mentioned	1. Provided important insights into reservoir biogeochemical cycling.	1. Requires a lot of data and/or parameterization for calibration.	1. The model could be conceptually improved by introducing a more detailed sediment compartment that accounted for slow degradation of OM and for the release of reduced substances, and by accounting for fluctuations of the surface water level.
Li et al., 2011	To calculate river ecological flow based on fish habitat conservation	Integrated		Fish habitat model					1. Model is relatively simple. 2. Seasonal effect of water environment was taken into account in the model.	1. Only considers three variables to predict the suitability of the fish. 2. The variation of hydrologic frequency is not yet considered.	1. Incorporate in the model the relationship between flow pulse within important life stage of fish (spawning period) and hydrologic frequency.
		*Hydrodynamic model	Differential equations	Not mentioned	Water temperature, solar radiation, heat exchange between air and water in the channel, water depth, average discharge	Daily average values (water depth, velocity and water temperature)	Yes	Yes
		*Habitat suitability model	Fuzzy logic	Not mentioned	Output from the hydrodynamic model (water temperature, depth and velocity)	Habitat suitability index	Yes	Yes
Null et al., 2014	To evaluate water storage and scarcity from removing dams	Economic-engineering optimization model	Empirical methods	CALifornia Value Integrated Network (CALVIN)	Surface and ground water inflows, agricultural reuse, return flows and agricultural demands	Optimized water deliveries	Yes	Not mentioned	1. Model can provide tradeoff between dam removal with small reductions in water deliveries but with considerable fish habitat gains and largely reduced water deliveries and small habitat gains. 2. Considers fish habitat versus economic water demands for removing dams over a large geographic area using an existing water management model.	1. CALVIN simplifies real-world conditions which both limits the model and makes its application. 2. Sediment storage benefits of reservoirs were ignored in the model. 3. CALVIN operates with perfect foresight, meaning the model can optimize for flood and drought periods, so results depict a best case scenario for water management.
Owen et al., 1997	To model variability in experts' perception of satisfaction for hydropower generation, fish habitat, kayaking, rafting and scenery preservation on the Green river through operations of Flaming Gorge Dam	Perception model and habitat suitability model	Probabilistic fuzzy membership functions	Not mentioned	Streamflow, water level	Fuzzy objectives: "practicable firm" hydropower, "suitable" razorback sucker habitat, "enhanced" cottonwood habitat, "detrimental" tamarisk habitat, "enjoyable" kayaking, "enjoyable" rafting, and "magnificent" scenery	Yes	No	1. Incorporation of collective expert perception of subjective management objectives. 2. Accounts for substantial variability in perceptions among experts.	2. Model was developed from a relatively low number of survey data.	1. Refining the inclusion of uncertainty inherent in fuzzy membership functions that represent diverse opinions. 2. Refining and improving the design of sample surveys to extract accurate and extensive characterization of expert opinion in a form amenable to fuzzy set models. 3. Optimal timing of the surveys.
Pert and Erman, 1994	To evaluate if habitat availability, use, and preference changed under variable flow conditions of hydropeaking. To determine if recognized individuals all responded similarly (in choice of habitat and movement) to fluctuating flows.	Habitat suitability model	Habitat use curves	Not mentioned	Water depth, velocity, substrate, water temperature	Habitat distributions and curves	Yes	No	1. Simplicity of the model. 2. Data that was used to train the model was collected on a standardized way.	1. Habitat distributions and curves oversimplified how individual fish responded to changing discharges. 2. Although habitat criteria curves give some information concerning the range and relative proportion of habitat use, they offer little information about whether different individuals that represent different portions of the curve actually behave differently.	1. Improvement on model development that generates habitat curves considering the important individual differences within a population of fish.
Quiroga et al., 2015	To determine the losses of habitat and juvenile Oncorhynchus mykiss, a recreationally important species, following the construction of the two dams	Habitat suitability model	Poisson additive models and Poisson linear models	Not mentioned	Mean local depth, mean local water velocity, water temperature, conductivity, dissolved oxygen, substrate size, suspended inorganic matter, suspended organic matter, wetted width, bankful width, distance from lake along river, slope, max channel depth, sinuosity, macroinvertebrate abundance *Variables in bold were retained in the selected model	Abundance of brown trout	Yes	Yes	1. Considers numerous input variable. 2. Model is relatively simple.	1. Data that was use to train the model was collected only in one sampling event.	1. Model training with data collected during maximum and moderate discharge.
Rheinheimer et al, 2013	To assess the hydropower effects of increasing minimum instream flows (MIFs) and imposing weekly scale down ramp rates (DRRs) in three locations in California’s Upper Yuba River (UYR). To maximise total revenue from energy generation plus additional benefits (e.g., demand) less penalties for unmet IFRs, subject to physical and operational constraints	Optimization model	Linear programming model using the General Algebraic Modeling System (www.gams.com) and the CONOPT3 solver	Not mentioned	Water evaluation and planning system model, hydrologic model, DAYMET meteorological data, fixed infrastructure parameter values, power plant characteristics, electricity prices, municipal water supply demands	Tradeoff curves	Yes		1. The model output, the tradeoff curves, can be interpreted in several ways, depending on the question being asked. Therefore, various management options can be considered depending on what is the priority. 2. The model outcome can be used qualitatively and quantitatively to inform the development of long-term adaptation strategies by both hydropower operators and environmental interest groups.	1. The models made a lot of assumptions which may not be valid in all cases or situation.	1. Possibility to model hydropower systems to consider climate change impacts for hydropower relicensing.
Reutz and Jennings, 2000	To calculate prolonged swimming speeds (i.e., water velocity at which 50% of fish failed to swim for 1 h) for each size-class of robust redhorse fish (Moxostoma robustum) larvae and to predict the proportion of larvae in the water column that could maintain their position in the river.	Habitat suitability model	Logistic regression	Not mentioned	Mean velocity	Proportion of larvae that could maintain their position in the water column for 1 h at each velocity point estimate along the transect	Yes	No	1. The model is simple.	1. Other variables could have influenced the swimming and survival of larvae in the stream such as the presence of predator. 2. Models were developed using experimental data. However, this data may not be representative of the stream data. Environmental variables can be very variable in real stream conditions. On the other hand, an experimental set up have a very controlled and stable conditions.	1. Incorporation of other abiotic and biotic variables that would affect the survival of fish larvae in the model would enhance the model.
Sinokrot and Gulliver, 2000	To predict the water temperature that would have occured with various minimum in-stream flow criteria applied to the reach.	Water quality model	One-dimensional heat advection-dispersion equation	MNSTREM	Water temperature, air temperature, latitude, altitude, relative humidity, solar radiation, wind velocity, cloud cover, air pressure, total length of river reach, cross-sectional area, surface width as a function of discharge, stream flow rate, groundwater inflow/outflow, temperature profile in the sediment	Water temperature	Yes	Yes	1. Trained with relatively large dataset. Good predictive performance.	1. Requires a lot of input data.	1. Application of model output to the temperature preferences of biota.
Vezza et al., 2014	To model habitat in high-gradient streams. To select habitat attributes influencing species presence or abundance at different life stages.	Integrated model (Habitat-hydraulic models wherein habitat suitability model was incorporated)	HMU dileanation, logistic regression, development of habitat–flow rating curves	Modified MesoHABSIM simulation system	Hydromorphologic units (HMUs), HMU gradient, HMU longitudinal gradient, canopy cover, substrate, water depth, flow velocity, water temperature, water pH, dissolved oxygen, turbidity, biological oxygen demand	Habitat rating curves, time series analysis	Yes	Yes (fivefold cross validation to the logistic regression models)	1. Tested in several streams in Alps. 2. Habitat suitability models were built at regional scale to enable their transferability among different streams with different morphologies. 3. A model specifically developed for high gradient streams.	1. Limitations of this model is ignoring other factors e.g., thermal stresses, that could affect the fish community. 2. The available physical habitat area does not take into account any limitations caused by biotic interactions (such as predation, competition, and mutualism).	1. For model extrapolation and application purposes, the biological models can be constructed using data from different streams with different morphologies and gradients. 2. Model to consider other biological habitat descriptors, e.g., fish guild and macroinvertebrate community composition, due to their importance in limiting species presence or abundance.
Wang et al., 2013	To determine the suitable ranges and suitability curves of the Chinese sturgeon	Integrated model							1. Simplicity of the model.	1. Model was not validated. 2. Considers limited number of variables. Other variables could have affected the suitability of fish. 3. Simulated data was used to build the habitat suitabity curves. Simulated data may be associated with errors.
		*Hydrodynamic model	Two-dimensional hydraulics	Not mentioned	Not mentioned	Velocity, depth, temperature and substrate	Yes	No
		*Habitat suitability model	Suitabity curves and suitabilility index calculation	Not mentioned	Simulations from the hydraulics model (water temperature, water depth, substrate, water temperature, flow velocity), suspended sediment concentration	Habitat suitability index	Yes	No
Wu et al., 2010	To predict species richness and total densities at impacted habitats	Habitat suitability model	Partial least squares regression	Not mentioned	pH, dissolved oxygen, conductivity, chloride, total dissolved solid, water temperature, oxidation reduction potential and turbidity, water depth, channel width, current velocity, total phosphorus, orthophosphate-P, calcium	Diatom indices (pollution-tolerance index, species richness, total density, Margalef diversity, Pielou evenness, Shannon–Wiener diversity and five growth forms) based on diatom abundances	Yes	Yes	1. Inclusion of many environmental variables.	1. Biotic interactions was not incorporated in the model.	1. Incorporation of biotic interactions and habitat changes in the model as this may also explain why diatom species richness was positively affected by flow regulation.
Yarnell et al., 2012	To evaluate potential effects of flow variation on frog egg masses and tadpoles	Integrated model							1. River2D can model variations in wetting and drying in shallow areas by incorporating groundwater equations. 2. The model output provided information on both the potential susceptibility of early frog life stages to flow fluctuations and the influence of channel morphology on habitat suitability.	1. River2D cannot explicitly model standing water that is disconnected from the main channel flow. 2. Multiple interacting variables can influence the success of a particular species. Additional non-flow related environmental factors such as presence of predators and degree of shading may also influence general habitat suitability. The model only considers flow related environmental factors to pr…
		*Hydrodynamic model	2D hydrodynamic model	River2D	Reach-scale topographic surveys, detailed roughness parameters, inflow discharge and downstream boundary conditions in the form of water surface elevation	Pulsed flow events (flow simulations)	Yes	Yes
		*Habitat suitability criteria	Based on data reviewed and collected directly at the study sites	Not mentioned	Water velocity, water depth	Suitability criteria	Yes	No
Zhai et al., 2010	To evaluate the change of river ecological integrity (contain the negative and the positive effects) after the hydropower cascade construction	Integrated model	Calculation models for marking criteria for river ecosystem integrity (soil erosion intensity, change rate of river network, earthquake magnitude, average river-bed elavation, river-bed deformation ration, change rate of width depth ratio, surface water width, dam numbers, effective storage, storage cofficient, running water proportion), regression model	Not mentioned	Rainfall data, digital elevation map, sediment concentration data, remote sensing image data,	River Ecosystem Integrity (REI) index	Yes	Yes (10-fold cross validation for the regression curves)	1. REI index can easily be calculated by values with only key design parameters and the number of dams on the river reaches.	1. Since the ecological effects of the construction are very complex, results may not be very accurate.	1. The model prediction output on hydropower cascade development can be extended to other rivers in the Longitudinal Range-Gorge Region and in other rivers similar to Lancang river.
Zhang et al., 2012	To discern possible impacts of the Three-Georges Dam (3GD) on the downstream flow and water level	Hydrodynamic model	Generalized additive models (GAMs)	Not mentioned	Rainfall data	Flow	Yes	Yes (Cross-validation)	1. Requires lesser data.	1. The model is an over simplification of the hydrological process.	1. Application in ecological processes.

## Sheet: References
References
Bartholow, J.M., Campbell, S.G. & Flug, M. (2004) Predicting the thermal effects of dam removal on the Klamath River. Environmental Management, 34, 856-874.
Boavida, I., Santos, J.M., Ferreira, T. & Pinheiro, A. (2015) Barbel habitat alterations due to hydropeaking. Journal of Hydro-Environment Research, 9, 237-247.
Bondi, C.A., Yarnell, S.M. & Lind, A.J. (2013) Transferability of Habitat Suitability Criteria for a Stream Breeding Frog (Rana Boylii) in the Sierra Nevada, California. Herpetological Conservation and Biology, 8, 88-103.
Burnett, K.M., Reeves, G.H., Miller, D.J., Clarke, S., Vance-Borland, K. & Christiansen, K. (2007) Distribution of salmon-habitat potential relative to landscape characteristics and implications for conservation. Ecological Applications , 17, 66-80.
Cerny, J., Copp, G.H., Kovac, V., Gozlan, R. & Vilizzi, L. (2003) Initial impact of the Gabcikovo hydroelectric scheme on the species richness and composition of 0+fish assemblages in the Slovak flood plain, River Danube. River Research and Applications, 19, 749-766.
Cioffi, F. & Gallerano, F. (2012) Multi-objective analysis of dam release flows in rivers downstream from hydropower reservoirs. Applied Mathematical Modelling, 36, 2868-2887.
Dai, T. & Labadie, J. W. (2001) River basin network model for integrated water quantity/quality management. Journal of Water Resources Planning and Management 127(5):295–305
Enders, E.C., Scruton, D.A. & Clarke, K.D. (2009) The 'Natural Flow Paradigm' and Atlantic Salmon-Moving from Concept to Practice. River Research and Applications, 25, 2-15.
Flanagan, D. C. & Livingston, S. J. Editors. (1995) USDA Water Erosion Prediction Project: User Summary. NSERL Report No. 11. USDA-ARS National Soil Erosion Research Laboratory, West Lafayette, Indiana, USA.
Freeman, M.C., Bowen, Z.H., Bovee, K.D. & Irwin, E.R. (2001) Flow and habitat effects on juvenile fish abundance in natural and altered flow regimes. Ecological Applications, 11, 631-631.
Fullerton, A.H., Steel, E.A., Caras, Y., Sheer, M., Olson, P. & Kaje, J. (2009) Putting watershed restoration in context: Alternative future scenarios influence management outcomes. Ecological Applications, 19, 218-235.
Garcia, A., Jorde, K., Habit, E., Caamano, D. & Parra, O. (2011) Downstream Environmental Effects of Dam Operations: Changes in Habitat Quality for Native Fish Species. River Research and Applications, 27, 312-327.
Gore, J.A. & Hamilton, S.W. (1996) Comparison of flow-related habitat evaluations downstream of low-head weirs on small and large fluvial ecosystems. Regulated Rivers-Research & Management, 12, 459-469.
Grand, T.C., Railsback, S.F., Hayse, J.W. & Lagory, K.E. (2006) A physical habitat model for predicting the effects of flow fluctuations in nursery habitats of the endangered Colorado pikeminnow (Ptychocheilus lucius). River Research and Applications, 22, 1125-1142.
Grill, G., Dallaire, C.O., Chouinard, E.F., Sindorf, N. & Lehner, B. (2014) Development of new indicators to evaluate river fragmentation and flow regulation at large scales: A case study for the Mekong River Basin. Ecological Indicators, 45, 148-159.
Hatten, J.R. & Batt, T.R. (2010) Hydraulic Alterations Resulting From Hydropower Development in the Bonneville Reach of the Columbia River. Northwest Science, 84, 207-222.
Hatten, J.R. & Parsley, M.J. (2009) A spatial model of white sturgeon rearing habitat in the lower Columbia River, USA. Ecological Modelling, 220, 3638-3646.
Jacoub, G. & Westrich, B. (2006) Modelling transport dynamics of contaminated sediments in the headwater of a hydropower plant at the Upper Rhine River. Acta hydrochimica et hydrobiologica, 34, 279-286.
Jensen, D., E. A. Steel, A. H. Fullerton, & Pess, G. (2009) Impact of fine sediment on egg-to-fry survival of Pacific salmon: a meta-analysis of published studies. Reviews in Fisheries Science.
Jorde, K. (1997) Okologisch Begrundete, Dynamische Mindestwasserregelungen bei Ausleitungskraftwerken (Dissertation). Universitat Stuttgart, Stuttgart, Germany.
Kocovsky, P.M., Ross, R.M. & Dropkin, D.S. (2009) Prioritizing Removal of Dams for Passage of Diadromous Fishes on a Major River System. River Research and Applications, 25, 107-117.
Krause, C.W., Newcomb, T.J. & Orth, D.J. (2005) Thermal habitat assessment of alternative flow scenarios in a tailwater fishery. River Research and Applications, 21, 581-593.
Kunz, M.J., Wuest, A., Wehrli, B., Landert, J. & Senn, D.B. (2011) Impact of a large tropical reservoir on riverine transport of sediment, carbon, and nutrients to downstream wetlands. Water Resources Research, 47
Labadie, J. W. (1988) Program MODSIM: River basin network flow model for the microcomputer. Department of CivilEngineering, Colorado State University, Fort Collins.
Li, R.N., Chen, Q.W. & Duan, C. (2011) Ecological hydrograph based on Schizothorax chongi habitat conservation in the dewatered river channel between Jinping cascaded dams. Science China-Technological Sciences, 54, 54-63.
Lunetta R. S., Cosentino, B., Montgomery, D.R., Beamer, E.M. & Beechie, T.J. (1997) GIS-based evaluation of salmon habitat in the Pacific Northwest. Photogrammetric Engineering and Remote Sensing , 63(10), 1219–1229.
Miller, D. J. (2003) Landscape dynamics and forest management. USDA Forest Service, Rocky Mountain Research Station, General Technical Report RMRS-GTR-101CD. Fort Collins, Colorado, USA.
Null, S.E., Medellin-Azuara, J., Escriva-Bou, A., Lent, M. & Lund, J.R. (2014) Optimizing the dammed: Water supply losses and fish habitat gains from dam removal in California. Journal of Environmental Management, 136, 121-131.
Owen, W.J., Gates, T.K. & Flug, M. (1997) Variability in perceived satisfaction of reservoir management objectives. Journal of Water Resources Planning and Management-Asce, 123, 147-153.
Pert, E.J. & Erman, D.C. (1994) Habitat Use by Adult Rainbow-Trout under Moderate Artificial Fluctuations in Flow. Transactions of the American Fisheries Society, 123, 913-923.
Quiroga, A.P., Lancelotti, J.L., Riva-Rossi, C.M., Tagliaferro, M., Asorey, M.G. & Pascual, M.A. (2015) Dams versus habitat: predicting the effects of dams on habitat supply and juvenile rainbow trout along the Santa Cruz River, Patagonia. Hydrobiologia, 755, 57-72.
Rheinheimer, D.E., Yarnell, S.M. & Viers, J.H. (2013) Hydropower Costs of Environmental Flows and Climate Warming in California's Upper Yuba River Watershed. River Research and Applications, 29, 1291-1305.
Ruetz, C.R. & Jennings, C.A. (2000) Swimming performance of larval robust redhorse Moxostoma robustum and low-velocity habitat modeling in the Oconee River, Georgia. Transactions of the American Fisheries Society, 129, 398-407.
Schneider, M. (2001) Habitat e und Abflussmodellierung fur Fließgewasser mit unscharfen Berechnungsansatzen e Weiterentwicklung des Simulationsmodells CASIMIR (PhD thesis). In: Mitteilungen des Instituts fur Wasserbau, Heft 108. Universitat Stuttgart, Stuttgart, p. 257 (in German).
Schneider, M., Noack, M., Gebler, T. & Kopecki, I. (2010) Handbook for the Habitat Simulation Model. Casimir. Module Casimir-fish. Base SJE e Schneider & Jorde Ecological Engineering GmbH, LWW e InstitutVersion. fur Wasserbau, Universitat Stuttgart
Sinokrot, B.A. & Gulliver, J.S. (2000) In-stream flow impact on river water temperatures. Journal of Hydraulic Research, 38, 339-349.
Steel, A., A. Fullerton, Y. Caras, M. Sheer, P. Olson, D. Jensen, J. Burke, M. Maher, & McElhany, P. (2008) A spatially explicit decision support system for managing wide ranging species. Ecology and Society , 13.
Steel, E. A., A. Fullerton, Y. Caras, M. B. Sheer, P. Olson, D. Jensen, J. Burke, M. Maher & McElhany, P. (2007) The Lewis River Case Study: Final Report. Northwest Fisheries Science Center, Seattle, WA. Available at: http://www.nwfsc.noaa.gov/research/divisions/ec/wpg/documents/lrcs/LewisRiverCaseStudyFinalReport.pdf (accessed 4/30/08).
Steffler, P. (2000) Software River2D. Two Dimensional Depth Averaged Finite Element Hydrodynamic Model. University of Alberta, Canada.
USACE (US Army Corps of Engineers). (1986) HEC-5 Simulation of flood control and conservation systems, Appendix on Water Quality Analysis, 220 pp.
Vezza, P., Parasiewicz, P., Spairani, M. & Comoglio, C. (2014) Habitat modeling in high-gradient streams: the mesoscale approach and application. Ecological Applications, 24, 844-861.
Wang, Z.Y., Lee, J.H.W. & Xu, M.Z. (2013) Eco-hydraulics and eco-sedimentation studies in China. Journal of Hydraulic Research, 51, 19-32.
WDFW (Washington Department of Fish and Wildlife). (2004). Salmon and Steelhead Habitat Inventory and Assessment Program (SSHIAP) Data on fish passage barriers (1:24,000), physical stream segments, and fish distribution for Watershed Inventory Area (WRIA) 27. http://wdfw.wa.gov/hab/sshiap/ (accessed 4/30/08).
Wu, N., Tang, T., Fu, X., Jiang, W., Li, F., Zhou, S., Cai, Q. & Fohrer, N. (2010) Impacts of cascade run-of-river dams on benthic diatoms in the Xiangxi River, China. Aquatic Sciences, 72, 117-125.
Yarnell, S.M., Lind, A.J. & Mount, J.F. (2012) Dynamic flow modelling of riverine amphibian habitat with application to regulated flow management. River Research and Applications, 28, 177-191.
Zhai, H.J., Cui, B.S., Hu, B. & Zhang, K.J. (2010) Prediction of river ecological integrity after cascade hydropower dam construction on the mainstream of rivers in Longitudinal Range-Gorge Region (LRGR), China. Ecological Engineering, 36, 361-372.
Zhang, Q., Li, L., Wang, Y.G., Werner, A.D., Xin, P., Jiang, T. & Barry, D.A. (2012) Has the Three-Gorges Dam made the Poyang Lake wetlands wetter and drier? Geophysical Research Letters, 39, n/a-n/a.
